# Supplementary material
Source: HighWire-hosted journal article supplement (https://www.annfammed.org/highwire/filestream/14036/field_highwire_adjunct_files/0/Carroll.pdf)
Supplement: Carroll.pdf [file Carroll.pdf]

## Supplemental material for:

Carroll JK, Finn L, Scharer K, et al. Moving from in-person to telehealth group visits for a mindful-eating healthy nutrition program. *Ann Fam Med*. 2021;19(5):466-466.

*Jennifer K. Carroll, MD, MPH<sup>1,2</sup>*

*Leonard Finn, MD<sup>3</sup>*

*Kirsten Scharer<sup>3</sup>*

*Lauren Kiel<sup>4</sup>*

*Ashley Kiel<sup>5</sup>*

*Elisabeth Callen, PhD, GStat<sup>6</sup>*

*Erin Callister<sup>7</sup>*

*Ina Campbell<sup>8</sup>*

*Emma Anderson, MA<sup>9</sup>*

*Lauren Grossman, MD, SM<sup>2,10</sup>*

*Carrie Landin, PsyD<sup>2</sup>*

*Anne Nederveld, MD, MPH<sup>1</sup>*

<sup>1</sup>University of Colorado Department of Family Medicine, Aurora, Colorado

<sup>2</sup>UCHealth Integrative Medicine Center, Denver, Colorado

<sup>3</sup>Needham Wellesley Family Medicine PC, Wellesley, Massachusetts

<sup>4</sup>Tufts University, Middlesex County, Massachusetts

<sup>5</sup>Boston University, Boston, Massachusetts

<sup>6</sup>American Academy of Family Physicians, Leawood, Kansas

<sup>7</sup>University of Nevada, Reno School of Medicine, Reno, Nevada

<sup>8</sup>MarillacHealth, Grand Junction, Colorado

<sup>9</sup>Center for Improving Value in Health Care, Denver, Colorado

<sup>10</sup>University of Colorado, Division of General Internal Medicine, Aurora, Colorado

**Key words:** telehealth; mindfulness; healthy nutrition; group visits

**Previous presentation:** Preliminary results were presented at the North American Primary Care Research Group (NAPCRG) 2019 Annual Meeting; November 16-20, 2019; Toronto, Canada, and the 2020 NAPCRG PBRN meeting, August 13-14, 2020.
